# Supplementary material for: Cytoskeletal Responses and Aif-1 Expression in Caco-2 Monolayers Exposed to Phorbol-12-Myristate-13-Acetate and Carnosine
Source: Biology (Basel). 2022 Dec 25;12(1):36. doi: 10.3390/biology12010036 (PMC9855102; doi:10.3390/biology12010036)
Supplement: Supplementary file 1 [file biology-12-00036-s001.zip › biology-2032174-supplementary.pdf]

## Image of WB for beta-actin as reported in results

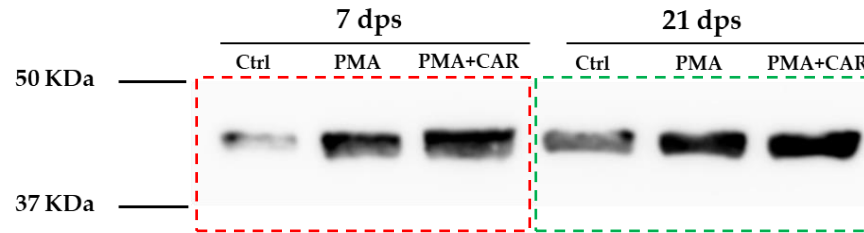

## Precision Plus Protein All Blue Standards

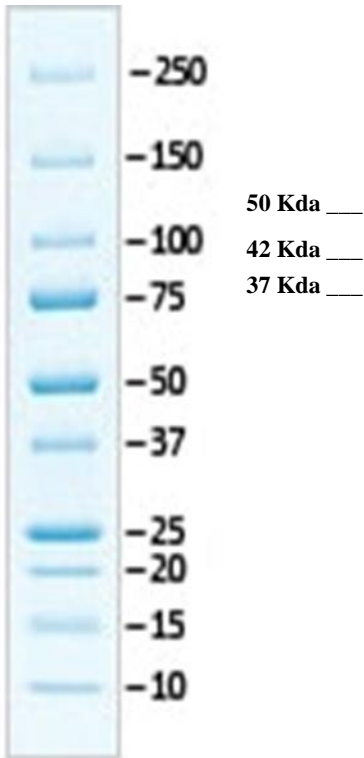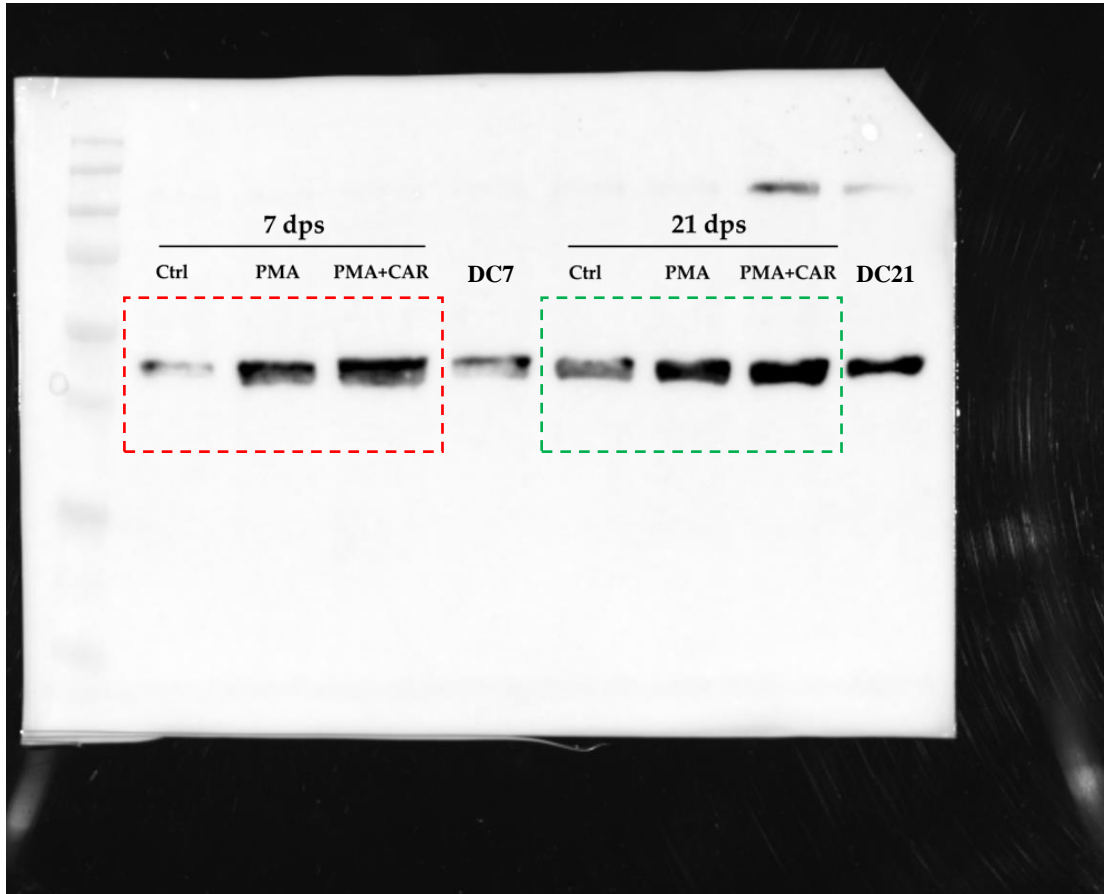

## DC7/21: doubled control at 7/21 dps

## 20 ug protein loading per lane

## Western blotting details:

Following electrophoresis on stain-free pre-cast 12% polyacrylamide gels (Bio-Rad), proteins from cell lysates were electro-transferred to polyvinylidene fluoride (PVDF) membranes. After protein transfer, the membranes were blocked for 5 minutes in EveryBlot Blocking Buffer (Bio-Rad), and then immunoblotted in EveryBlot Blocking Buffer with the following primary antibody: **mouse monoclonal anti-β-actin primary antibody** (Sigma-Aldrich, clone AC-15, product ID A5441; dilution 1:20000). After rinsing, blots were incubated with conjugated anti-mouse secondary antibody (Sigma-Aldrich) and the immune reactive bands were detected using an enhanced chemiluminescence method (ECL kit, Bio-Rad) with ChemiDoc™ Imaging System (Bio-Rad). Densitometric quantitative analysis was carried out by using the Image Lab software version 6.1 (Bio-Rad). The pixel intensity for each band was analyzed, the background was subtracted, and the protein expression results were normalized with respect to the total lane of the loaded samples. As molecular weight markers, the Precision Plus Protein All Blue Standards (Bio-Rad, cat. no. #161-0373) was used.

Image of WB for beta-actin as reported in results

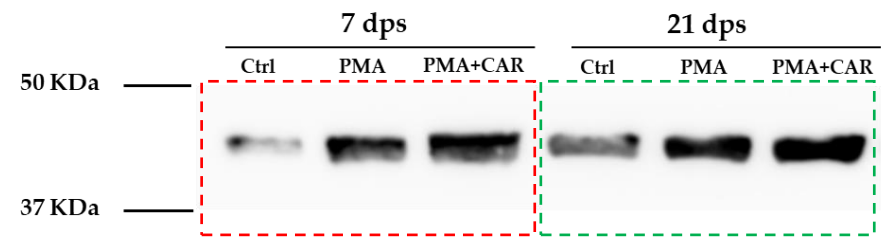

|          | biological replicates |            |            |  |             |        |  |             |            |       |
|----------|-----------------------|------------|------------|--|-------------|--------|--|-------------|------------|-------|
|          | A                     | B          | C          |  |             |        |  |             |            |       |
|          | Norm. Vol.            | Norm. Vol. | Norm. Vol. |  | Average     | %      |  | dev. st     | err        | err % |
| 7 dps    |                       |            |            |  |             |        |  |             |            |       |
| Ctrl     | 10865910              | 46781196   | 31104400   |  | 29583835,3  | 100,0  |  | 18005861,0  | 10395688,7 | 35,1  |
| PMA      | 65257000              | 65580000   | 36650000   |  | 55829000,0  | 188,7  |  | 16610286,4  | 9589953,3  | 32,4  |
| PMA +CAR | 62257120              | 64574583   | 78960520   |  | 68597407,7  | 231,9  |  | 9049211,7   | 5224564,8  | 17,7  |
| 21 dps   |                       |            |            |  |             |        |  |             |            |       |
| Ctrl     | 166063127             | 256054230  | 21535892   |  | 147884416,3 | 499,9  |  | 118311292,2 | 68307056,4 | 230,9 |
| PMA      | 353860196             | 393365127  | 118687866  |  | 288637729,7 | 975,7  |  | 148500427,7 | 85736761,9 | 289,8 |
| PMA +CAR | 273065182             | 482298977  | 232222238  |  | 329195465,7 | 1112,8 |  | 134154949,2 | 77454396,1 | 261,8 |

**Table of densitometry values.** Densitometric quantitative analysis was carried out by using the Image Lab software version 6.1 (Bio-Rad). The pixel intensity for each band was analyzed, the background was subtracted, and the protein expression values were normalized with respect to the respective total lane of the loaded protein samples; normalized values were reported as % of control (Ctrl) at 7 dps [- <https://www.bio-rad.com/it-it/applications-technologies/total-protein-normalization?ID=PODYJQRT8IG9> - [https://www.bio-rad.com/webroot/web/pdf/lsr/literature/Bulletin\\_6360.pdf](https://www.bio-rad.com/webroot/web/pdf/lsr/literature/Bulletin_6360.pdf) - Nature: Information for Authors & Referees > Policies > Image Integrity and Standards - Fosang AJ, Colbran RJ (2015).]

### Image of WB for AIF-1 as reported in results

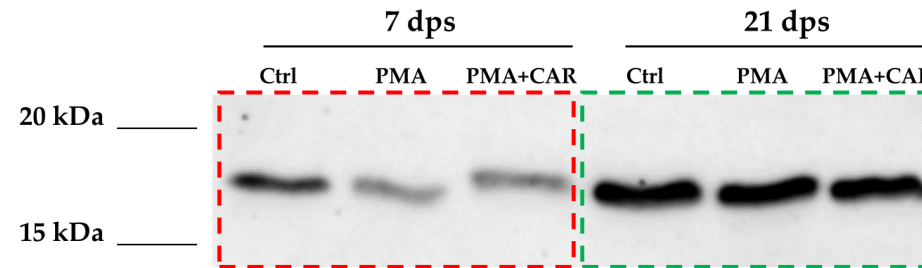

### Precision Plus Protein All Blue Standards

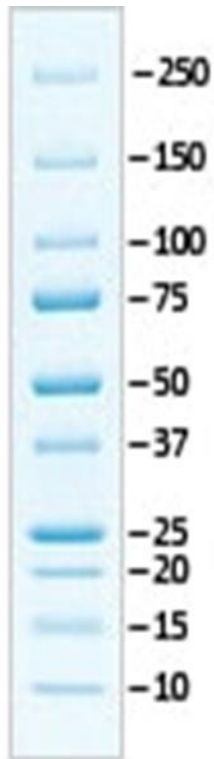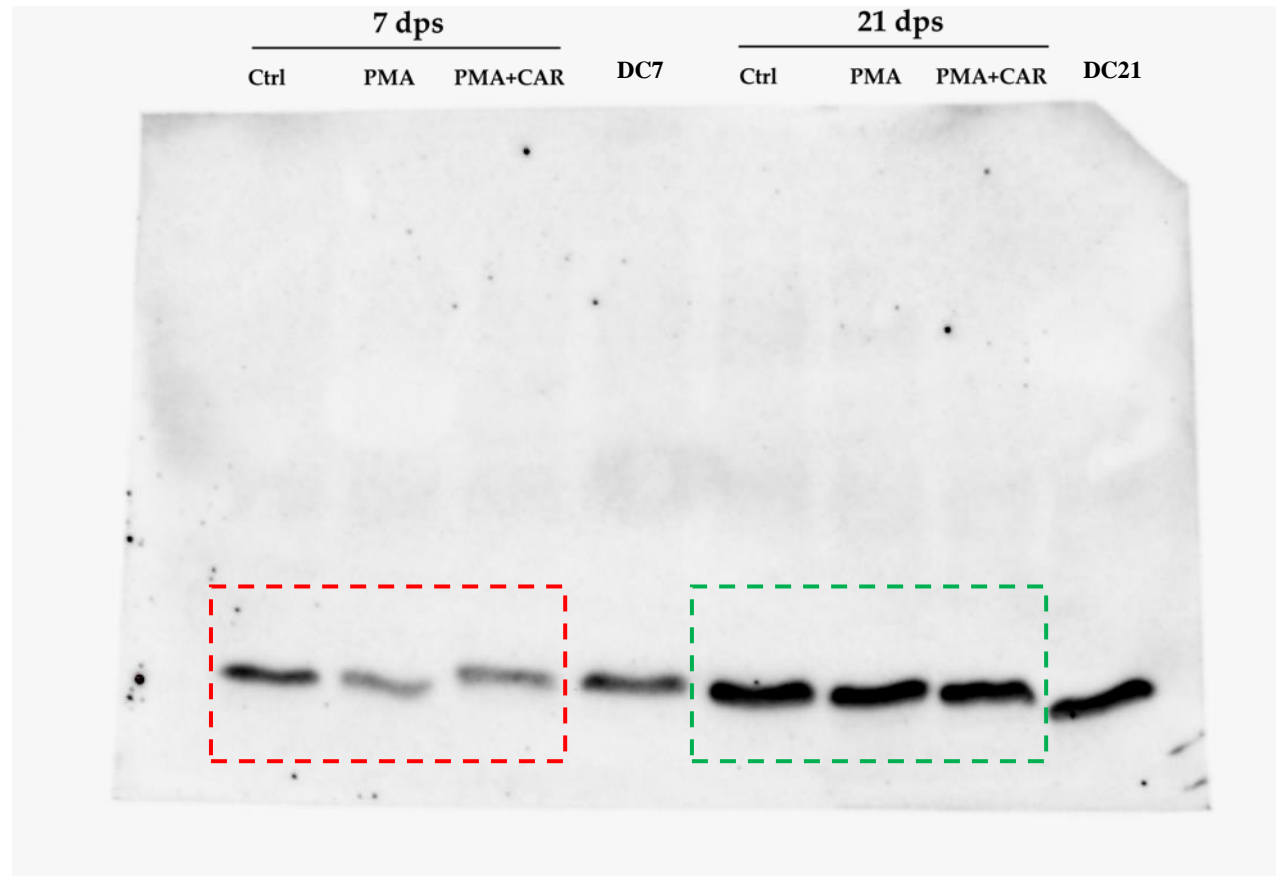

### DC7/21: doubled control at 7/21 dps

### 20 ug protein loading per lane

### Western blotting details:

Following electrophoresis on stain-free pre-cast 12% polyacrylamide gels (Bio-Rad), proteins from cell lysates were electro-transferred to polyvinylidene fluoride (PVDF) membranes. After protein transfer, the membranes were blocked for 5 minutes in EveryBlot Blocking Buffer (Bio-Rad), and then immunoblotted in EveryBlot Blocking Buffer with the following primary antibody: rabbit polyclonal anti-AIF1 primary antibody (Proteogenix, product ID A002181; dilution 1:1000). After rinsing, blots were incubated with conjugated anti-rabbit secondary antibody (Sigma-Aldrich) and the immune reactive bands were detected using an enhanced chemiluminescence method (ECL kit, Bio-Rad) with ChemiDocTM Imaging System (Bio-Rad). Densitometric quantitative analysis was carried out by using the Image Lab software version 6.1 (Bio-Rad). The pixel intensity for each band was analyzed, the background was subtracted, and the protein expression results were normalized with respect to the total lane of the loaded samples. As molecular weight markers, the Precision Plus Protein All Blue Standards (Bio-Rad, cat. no. #161-0373) was used.

Image of WB for AIF-1 as reported in results

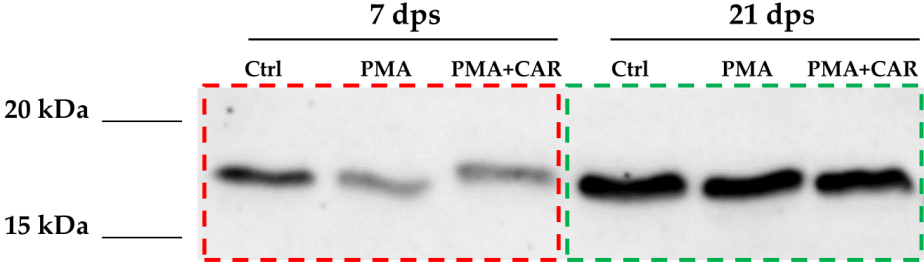

Precision Plus Protein  
All Blue Standards

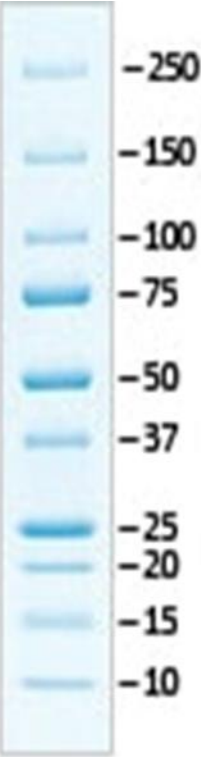

Image of protein loading showing molecular marker

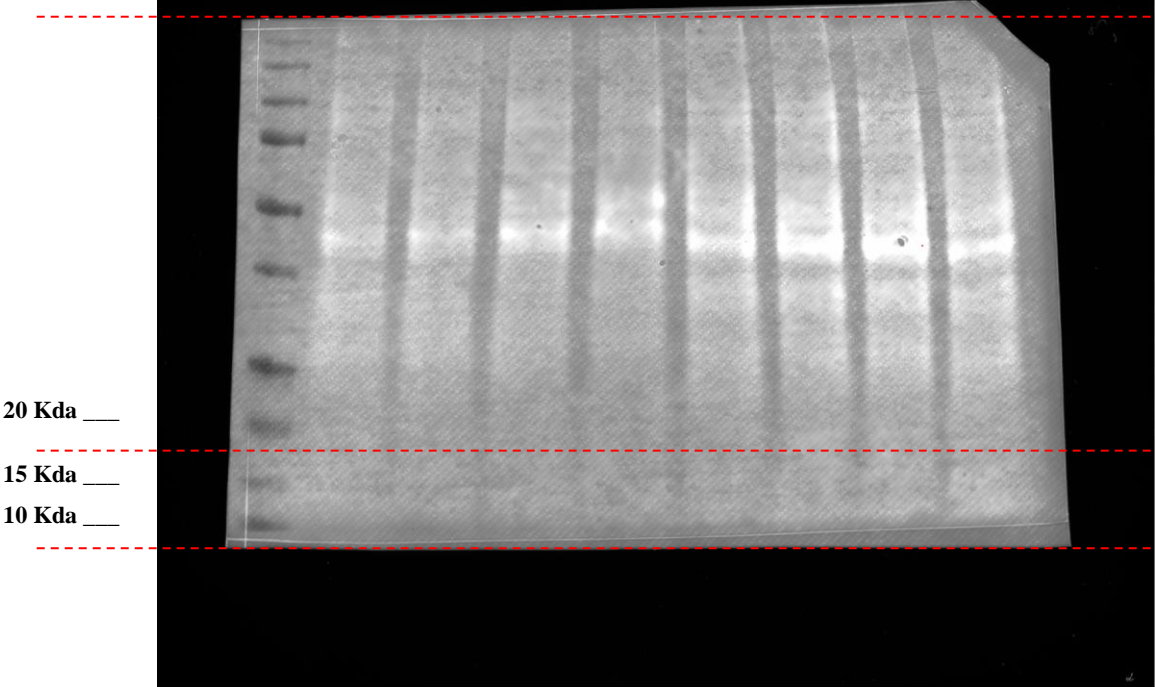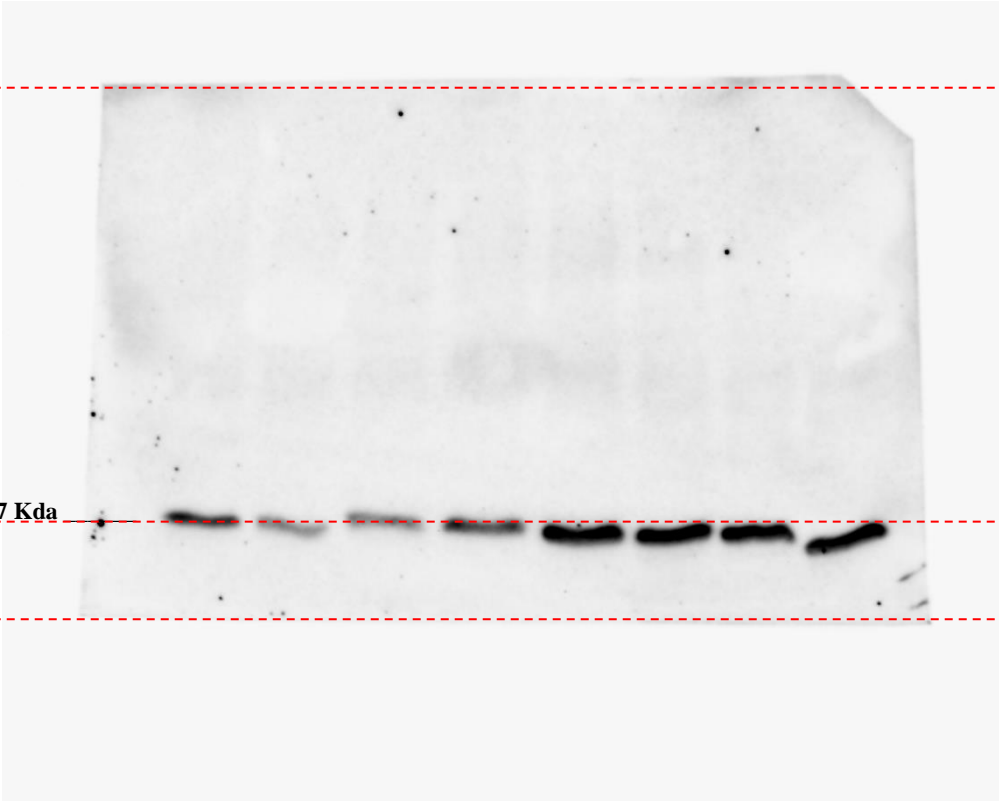

### Image of WB for AIF-1 as reported in results

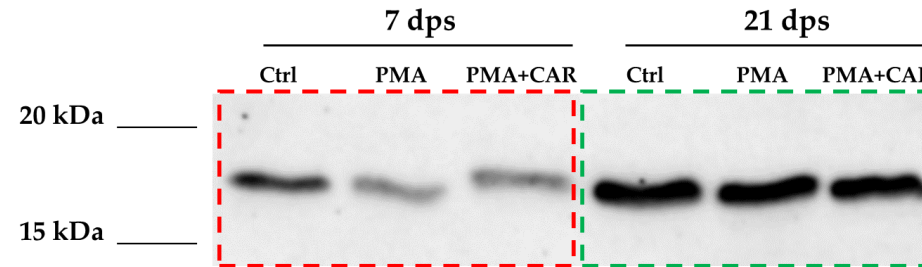

|               | biological replicates |            |            |  |            |       |  |            |            |       |
|---------------|-----------------------|------------|------------|--|------------|-------|--|------------|------------|-------|
|               | A                     | B          | C          |  |            |       |  |            |            |       |
|               | Norm. Vol.            | Norm. Vol. | Norm. Vol. |  | Average    | %     |  | dev. st    | err        | err % |
| <b>7 dps</b>  |                       |            |            |  |            |       |  |            |            |       |
| Ctrl          | 25094090              | 65007920   | 32094090   |  | 40732033,3 | 100,0 |  | 21312883,5 | 12304999,1 | 30,2  |
| PMA           | 40900616              | 32102522   | 31050000   |  | 34684379,3 | 85,2  |  | 5409080,3  | 3122933,9  | 7,7   |
| PMA +CAR      | 28330075              | 30322316   | 44730075   |  | 34460822,0 | 84,6  |  | 8949046,0  | 5166734,1  | 12,7  |
| <b>21 dps</b> |                       |            |            |  |            |       |  |            |            |       |
| Ctrl          | 85184768              | 117179487  | 58284768   |  | 86883007,7 | 213,3 |  | 29484063,4 | 17022631,9 | 41,8  |
| PMA           | 55807680              | 71550733   | 53007680   |  | 60122031,0 | 147,6 |  | 9996070,3  | 5771233,9  | 14,2  |
| PMA +CAR      | 75586038              | 41081353   | 33886038   |  | 50184476,3 | 123,2 |  | 22290640,2 | 12869507,1 | 31,6  |

**Table of densitometry values.** Densitometric quantitative analysis was carried out by using the Image Lab software version 6.1 (Bio-Rad). The pixel intensity for each band was analyzed, the background was subtracted, and the protein expression values were normalized with respect to the respective total lane of the loaded protein samples; normalized values were reported as % of control (Ctrl) at 7 dps [- <https://www.bio-rad.com/it-it/applications-technologies/total-protein-normalization?ID=PODYJQRT8IG9> - [https://www.bio-rad.com/webroot/web/pdf/lsr/literature/Bulletin\\_6360.pdf](https://www.bio-rad.com/webroot/web/pdf/lsr/literature/Bulletin_6360.pdf) - Nature: Information for Authors & Referees > Policies > Image Integrity and Standards - Fosang AJ, Colbran RJ (2015).]

**Beta-actin WB: Image of protein loading on membrane after transfer from stain-free gel**

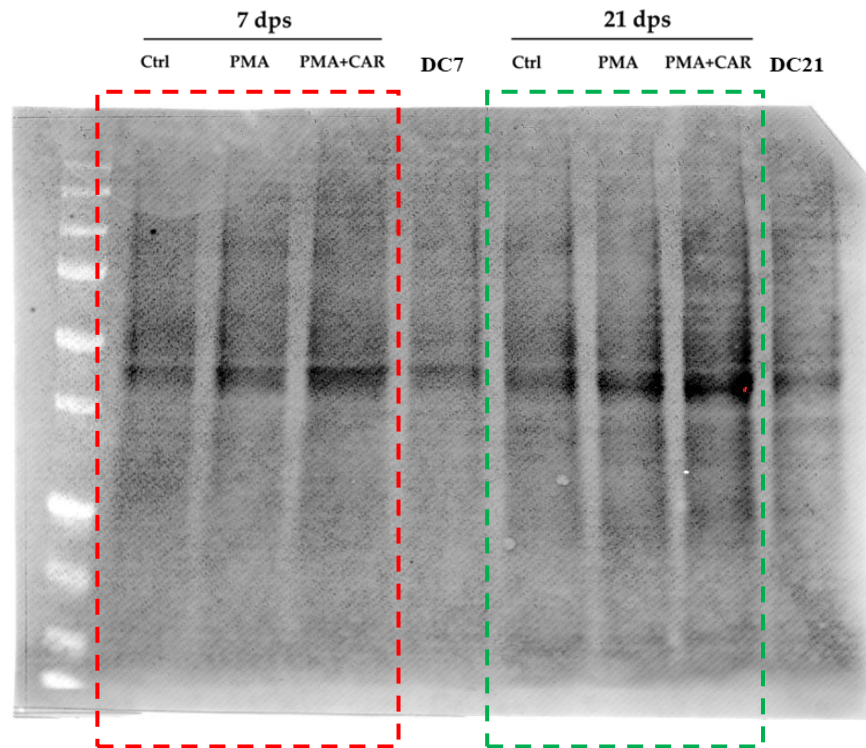

**AIF-1 WB: Image of protein loading on membrane after transfer from stain-free gel**

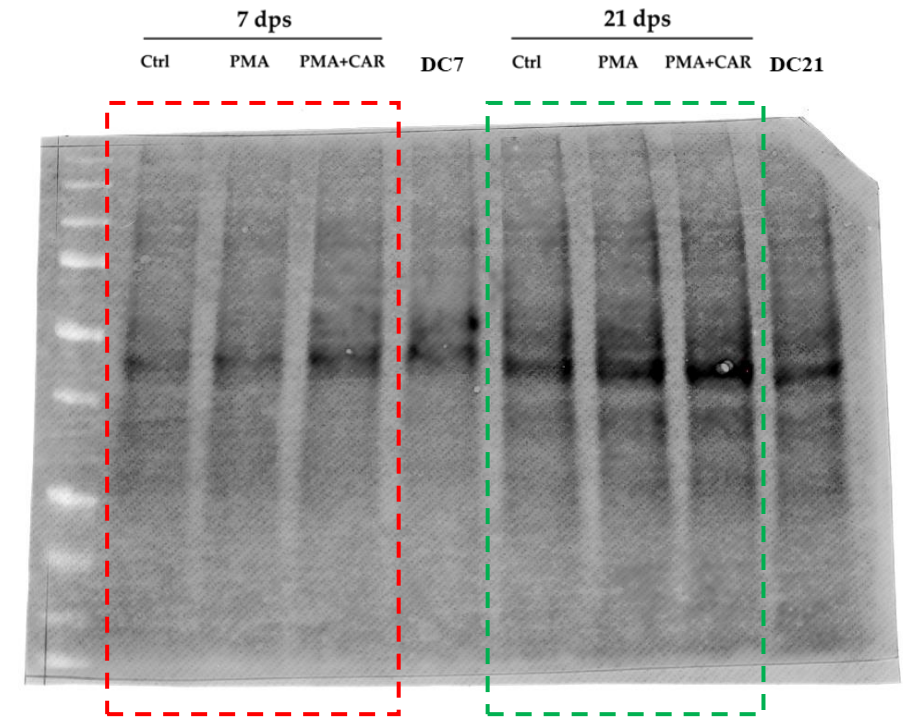

***Caco-2 monolayers at 21 dps: cell viability by MTT metabolic assay***

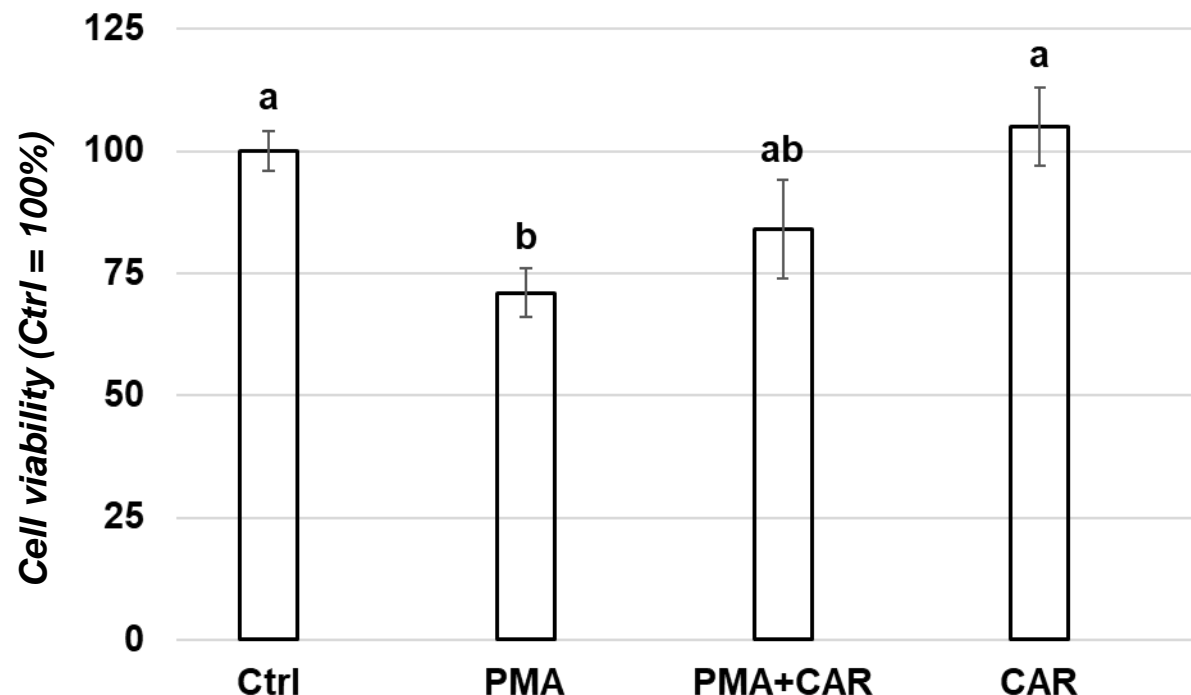

**MTT viability test on Caco-2 monolayers at 21 dps (days post seeding).** The histogram represents the results of viability assays by measuring metabolic activity with a standard MTT protocol performed after the experimental treatments for 48 hours (150 nM PMA, 150 nM PMA + 1 mM CAR, or 1 mM CAR alone; final concentrations in the culture medium). Data are represented as means (from  $n = 6$  biological replicates)  $\pm$  standard error of the mean (S.E.M.) and expressed as percent values with respect to the untreated control (100%). Statistical analysis: One-way ANOVA followed by Dunnett's multiple comparison test was performed using GraphPad Prism 9.4.0; different letters represent statistically different values ( $p$  value  $\leq 0.05$ ).
